# Supplementary material
Source: Springer Nature journal article supplement (https://www.springermedizin.de/resource/supplementary/12885_2014_4618_MOESM6_ESM.pdf/9466836)

**A****Relative MYC Expression**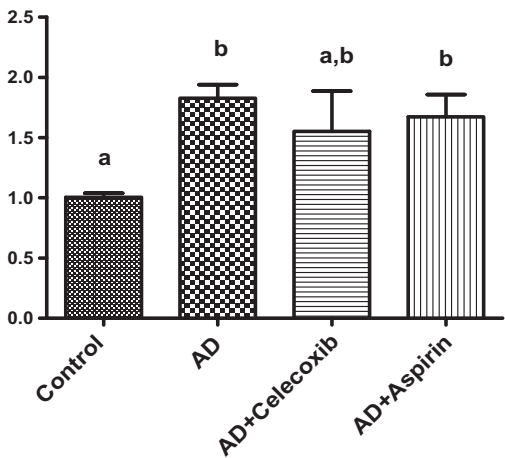**B****Relative E2F2 Expression**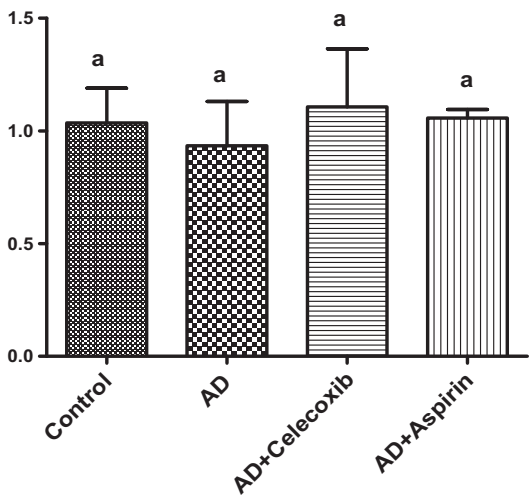

Supplement: MOESM6 [file 9466836]
